# Supplementary material
Source: HighWire-hosted journal article supplement (https://jnm.snmjournals.org/highwire/filestream/94541/field_highwire_adjunct_files/0/131631_Supplemental_Data.pdf)
Supplement: 131631_Supplemental_Data.pdf [file 131631_Supplemental_Data.pdf]

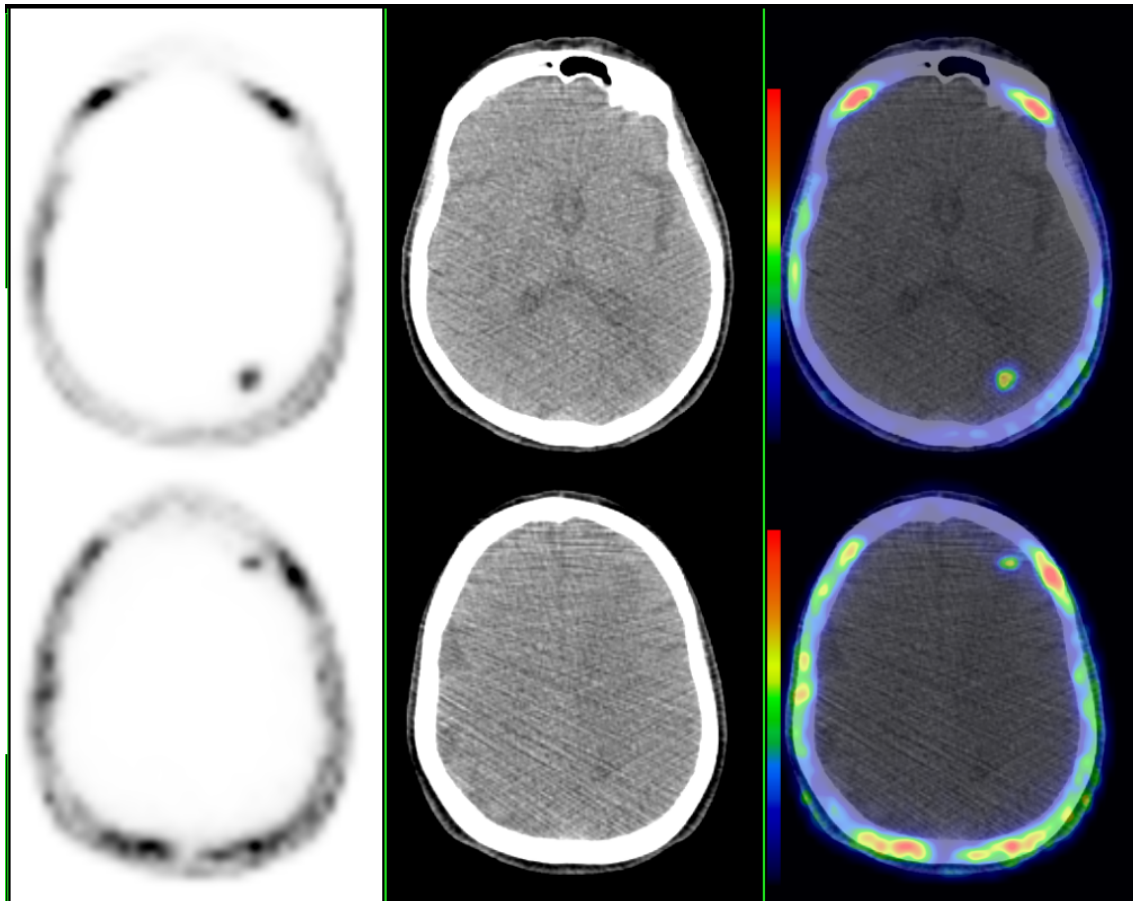

Supplemental Figure 3: Patient eligible for radical chemo-RT based on conventional staging, including  $FDG_0$  (excluding the cranium). Cerebral metastases were detected on baseline  $FLT_0$ , and confirmed independently on contrast-enhanced CT, changing the management to palliative.

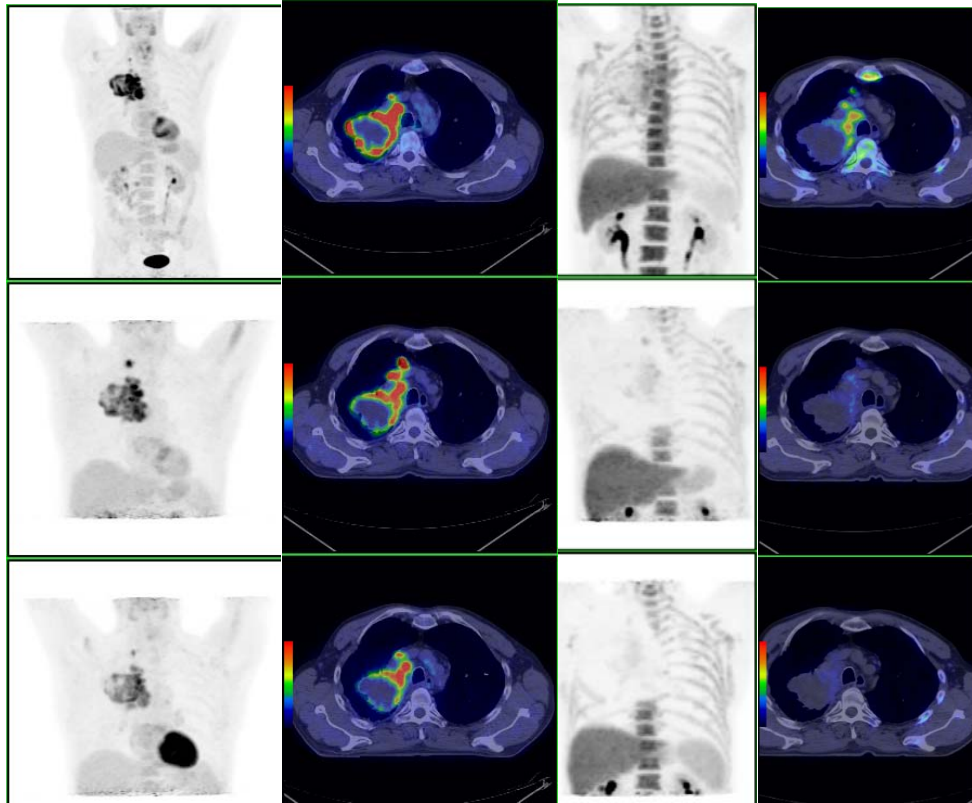

Supplemental Figure 4: Patient with T3N3M0 large cell carcinoma. PMR and PPR were reported at week 2, which continued at week 4. From left: Coronal FDG PET, Transverse FDG PET/CT, Coronal FLT PET, Transverse FLT PET/CT. Top row: baseline Middle row: week two Bottom row: week four.
